# Supplementary material for: Geographic variation and behavioral evolution in marine plankton: the case of Mastigias (Scyphozoa, Rhizostomeae)
Source: Springer Nature journal article supplement (doi:10.1007/s00227-003-1155-z), 2003-12-01
Supplement: SD1.pdf [file SD1.pdf]

**I. Sample sizes,  $\chi^2$  test-statistics, and degrees of freedom (d.f.) for tests of uniformity in the horizontal distribution of *Mastigias* in coves and marine lakes. All test statistics exceed the critical value of  $\chi^2$  for  $\alpha = 0.005$  (significance level corrected across times within locations using sequential Bonferroni).**

|            | Location |          |          |          |          |          |          |
|------------|----------|----------|----------|----------|----------|----------|----------|
|            | BJCK     | RCA      | OLO      | GLK      | CLM      | OTM      | BJLK     |
| time       | 0700 hrs | 0600 hrs | 0600 hrs | 0600 hrs | 0700 hrs | 0700 hrs | 0500 hrs |
| $n_1, n_2$ | 1, 40    | 2, 103   | 4, 1175  | 2, 50    | 2, 129   | 2, 258   | 2, 385   |
| $\chi^2$   | 40.75    | 20.15    | 154.45   | 36.75    | 55.73    | 233.00   | 92.96    |
| d.f.       | 3        | 3        | 3        | 2        | 3        | 4        | 3        |
| time       | 1100 hrs | 0800 hrs | 0900 hrs | 0800 hrs | 0900 hrs | 1000 hrs | 0900 hrs |
| $n_1, n_2$ | 1, 53    | 2, 170   | 3, 1048  | 2, 83    | 2, 406   | 2, 410   | 3, 956   |
| $\chi^2$   | 15.66    | 50.29    | 915.17   | 44.89    | 149.86   | 443.36   | 102.10   |
| d.f.       | 3        | 3        | 3        | 2        | 3        | 4        | 3        |
| time       | 1500 hrs | 1200 hrs | 1200 hrs | 1200 hrs | 1200 hrs | 1300 hrs | 1200 hrs |
| $n_1, n_2$ | 1, 52    | 1, 71    | 3, 634   | 2, 78    | 2, 251   | 2, 305   | 2, 648   |
| $\chi^2$   | 52.57    | 49.09    | 339.52   | 24.40    | 150.00   | 238.40   | 237.31   |
| d.f.       | 3        | 3        | 3        | 2        | 3        | 4        | 3        |
| time       | 1700 hrs | 1600 hrs | 1600 hrs | 1600 hrs | 1600 hrs | 1700 hrs | 1600 hrs |
| $n_1, n_2$ | 1, 45    | 1, 98    | 3, 558   | 2, 207   | 2, 217   | 2, 1084  | 2, 730   |
| $\chi^2$   | 31.19    | 69.43    | 306.70   | 122.35   | 15.18    | 3438.65  | 30.51    |
| d.f.       | 3        | 3        | 3        | 2        | 3        | 4        | 3        |
| time       |          |          |          | 2300 hrs |          | 2300 hrs | 2300 hrs |
| $n_1, n_2$ |          |          |          | 2, 39    |          | 2, 356   | 2, 366   |
| $\chi^2$   |          |          |          | 14.14    |          | 1064.55  | 30.36    |
| d.f.       |          |          |          | 2        |          | 4        | 3        |

$n_1$ , number of samples.  $n_2$ , total number of medusae measured in all samples.

**II. Orientation of swimming by *Mastigias*. Sample sizes, mean instantaneous swimming direction (mISD), sample circular variance (V),  $\chi^2$  test-statistics, degrees of freedom (d.f.), and uncorrected p-values for tests of randomly oriented swimming by *Mastigias* in coves and marine lakes. An asterisk indicates significantly non-random orientation at  $\alpha = 0.05$  after sequential Bonferroni correction for tests at multiple times within each location.**

|          | Location |          |          |          |          |          |          |
|----------|----------|----------|----------|----------|----------|----------|----------|
|          | BJCK     | RCA      | OLO      | GLK      | CLM      | OTM      | BJLK     |
| time     |          | 0800 hrs | 0730 hrs | 0600 hrs | 0800 hrs | 0800 hrs | 0900 hrs |
| n        | No data  | 27       | 251      | 90       | 93       | 182      | 324      |
| mISD     |          | 108°     | 099°     | 256°     | 083°     | 089°     | 254°     |
| V        |          | 0.833    | 0.624    | 0.770    | 0.475    | 0.521    | 0.869    |
| $\chi^2$ |          | 11.89    | 118.13   | 17.00    | 109.64   | 125.47   | 84.44    |
| d.f.     |          | 5        | 11       | 11       | 11       | 11       | 11       |
| p        |          | 0.036    | < 0.001* | 0.108    | < 0.001* | < 0.001* | < 0.001* |
| time     |          | 1200 hrs | 1200 hrs | 1600 hrs | 1600 hrs | 1300 hrs | 1200 hrs |
| n        |          | 22       | 118      | 87       | 76       | 90       | 273      |
| mISD     |          | 244°     | 323°     | 096°     | 264°     | 262°     | 277°     |
| V        |          | 0.835    | 0.789    | 0.676    | 0.799    | 0.601    | 0.965    |
| $\chi^2$ |          | 1.18     | 31.08    | 24.38    | 16.48    | 44.73    | 14.78    |
| d.f.     |          | 5        | 11       | 11       | 11       | 11       | 11       |
| p        |          | 0.946    | 0.001*   | 0.011*   | 0.124    | < 0.001* | 0.193    |
| time     |          | 1600 hrs | 1500 hrs | 2300 hrs |          | 2300 hrs | 1600 hrs |
| n        |          | 20       | 57       | 33       |          | 45       | 88       |
| mISD     |          | 343°     | 312°     | 175°     |          | 154°     | 205°     |
| V        |          | 0.505    | 0.782    | 0.662    |          | 0.826    | 0.926    |
| $\chi^2$ |          | 12.33    | 33.74    | 21.18    |          | 11.27    | 25.73    |
| d.f.     |          | 5        | 11       | 11       |          | 11       | 11       |
| p        |          | 0.031    | < 0.001* | 0.032    |          | 0.421    | 0.007*   |
