# Supplementary material for: Geographic variation and behavioral evolution in marine plankton: the case of Mastigias (Scyphozoa, Rhizostomeae)
Source: Springer Nature journal article supplement (doi:10.1007/s00227-003-1155-z), 2003-12-01
Supplement: SD2.pdf [file SD2.pdf]

**I. Vertical distribution of *Mastigias* at noon on sunny days and at night (2200 hrs). Weighted mean depth (WMD), sample sizes,  $\chi^2$  test-statistics, degrees of freedom (d.f.), and uncorrected p-values. An asterisk indicates significantly non-random distribution at  $\alpha = 0.01$  after sequential Bonferroni correction across times within each location.**

|       |            | Location |          |          |          |          |          |          |
|-------|------------|----------|----------|----------|----------|----------|----------|----------|
|       |            | BJCK     | RCA      | OLO      | GLK      | CLM      | OTM      | BJLK     |
| Day   | WMD (m)    | No data  | 0.55     | 0.12     | 1.67     | 5.87     | 3.02     | 5.56     |
|       | $n_1, n_2$ |          | 2, 29    | 2, 91    | 3, 54    | 3, 76    | 1, 134   | 5, 232   |
|       | $\chi^2$   |          | 130.50   | 459.28   | 73.60    | 78.31    | 347.67   | 152.98   |
|       | d.f.       |          | 5        | 3        | 4        | 7        | 7        | 9        |
|       | p          |          | < 0.001* | < 0.001* | < 0.001* | < 0.001* | < 0.001* | < 0.001* |
| Night | WMD (m)    | No data  | 7.76     | 1.79     | 4.53     | No data  | 6.48     | 10.30    |
|       | n          |          | 2, 25    | 2, 24    | 1, 30    |          | 1, 46    | 3, 94    |
|       | $\chi^2$   |          | 9.98     | 19.33    | 32.35    |          | 28.67    | 78.90    |
|       | d.f.       |          | 5        | 3        | 4        |          | 7        | 9        |
|       | p          |          | 0.08     | 0.002*   | < 0.001* |          | 0.002*   | < 0.001* |

$n_1$ , number of samples.  $n_2$ , total number of medusae measured in all samples.

**II. Vertical distribution of *Mastigias* at noon during sunny and overcast weather. The effect of less intense sunlight on vertical distribution is evident from comparison with Table I above (CLM and BJLK). An asterisk indicates significantly non-random distribution at  $\alpha = 0.01$  after sequential Bonferroni correction across conditions within each location. Abbreviations as above. See Table I for statistics describing sunny CLM and BJLK distributions.**

|            |          | Location |          |
|------------|----------|----------|----------|
|            |          | CLM      | BJLK     |
| Conditions | Sunny    | Overcast | Overcast |
| WMD (m)    | 0.00     | 1.89     | 3.93     |
| $n_1, n_2$ | 2, 17    | 1, 47    | 1, 147   |
| $\chi^2$   | 68.00    | 135.98   | 87.17    |
| d.f.       | 4        | 7        | 9        |
| p          | < 0.001* | < 0.001* | < 0.001* |
